# Supplementary material
Source: publisher figshare collection journal article supplement (https://sage.figshare.com/ndownloader/files/16218320)
Supplement: Supplementary file 1 [file 16218320]

Supplemental Narrative Description of Outcomes  
PART 1: PROMPTING PROCEDURE COMPARISONS

|                                | First Author                                                             | Narrative Description of Results                                                                                                                                                                                                                                                                                                                                                                                                                                                                                                                                                          |
|--------------------------------|--------------------------------------------------------------------------|-------------------------------------------------------------------------------------------------------------------------------------------------------------------------------------------------------------------------------------------------------------------------------------------------------------------------------------------------------------------------------------------------------------------------------------------------------------------------------------------------------------------------------------------------------------------------------------------|
| Single Prompt Comparisons      | T1: Ault, 1988<br>T1: Shook<br>T2: Head<br>T2: Schuster<br>T3: Singleton | <i>Type 1: Constant versus progressive time delay.</i> In 7 comparisons, participants learned faster via CTD; in 2 comparisons, participants learned faster with PTD; in 5 comparisons, data were undifferentiated. <i>Type 2: CTD vs. simultaneous prompting.</i> In 7 comparisons, participants learned faster via SP; in 5 comparisons, participants learned faster with CTD; in 12 comparisons, data were undifferentiated. <i>Type 3: SP vs. antecedent prompt and test.</i> In 11 comparisons, participants learned faster with APT; in one comparison, data were undifferentiated. |
| Hierarchical Comparisons       | Cengher<br>Leaf, 2016a                                                   | In 5 comparisons, participants learned faster with most-to-least prompts compared to procedures that increase or reduce prompt intrusiveness based on within-session responding (SLP, FPF); in 4 comparisons, participants learned faster with SLP or FPF; in 5 comparisons, data were undifferentiated.                                                                                                                                                                                                                                                                                  |
| Single Prompt vs. Hierarchical | Bennett<br>Boulware<br>Boutain<br>Godby                                  | In 11 comparisons, participants learned faster with single prompt procedures; in 3 comparisons, participants learned faster with hierarchical prompt procedures; in 17 comparisons, data were undifferentiated.                                                                                                                                                                                                                                                                                                                                                                           |
| Errorless vs. Error Correction | Gorgan<br>Leaf, 2010<br>Leaf, 2014<br>Leaf, 2016c                        | In 13 comparisons, participants learned faster with error correction; in 4, participants learned faster with errorless instruction; in 13, data were undifferentiated.                                                                                                                                                                                                                                                                                                                                                                                                                    |

Supplemental Narrative Description of Outcomes  
PART 2: ANTECEDENT VARIATIONS

|                          | First Author | Narrative Description of Results                                                                                                                                          |
|--------------------------|--------------|---------------------------------------------------------------------------------------------------------------------------------------------------------------------------|
| Extra verbal information | Humphreys    | In one comparison each, participants acquired skills faster or slower when extra verbal information was included in prompt. In 3 comparisons, data were undifferentiated. |
| Extra visual             | Pufpaff      | For all participants, visual information in form of superimposed images resulted in slower acquisition of reading words.                                                  |

Supplemental Narrative Description of Outcomes  
PART 3: CONSEQUENCE VARIATIONS

|                            | First Author                                        | Narrative Description of Results                                                                                                                                                                                                                                                                                                                                                                                                                                                                                                                                                                                               |
|----------------------------|-----------------------------------------------------|--------------------------------------------------------------------------------------------------------------------------------------------------------------------------------------------------------------------------------------------------------------------------------------------------------------------------------------------------------------------------------------------------------------------------------------------------------------------------------------------------------------------------------------------------------------------------------------------------------------------------------|
| Instructive Feedback (IF)  | Apple<br>Reichow                                    | In 5 comparisons, participants learned faster when IF was provided; in 2 comparisons, participants learned faster when it was not provided; in 5 comparisons, data were undifferentiated.                                                                                                                                                                                                                                                                                                                                                                                                                                      |
| Reward Procedures          | T1: Harrell<br>T2: Majdalany, 2016<br>T3: Toussaint | <i>Type 1: Independent (IC) vs. interdependent contingencies (ITC).</i> In 3 comparisons, participants acquired skills faster with IC; in 2 comparisons, participants acquired skills faster with ITC; in two, data were undifferentiated. <i>Type 2: Shorter vs. longer delays to reinforcement.</i> In 5 comparisons, participants learned faster with shorter delays; in 4 comparisons, results were undifferentiated. <i>Type 3: Choice of reward vs. no choice.</i> In 2 comparisons, participants learned faster when choice was provided; in 1 comparison, data were undifferentiated.                                  |
| Reward Type                | T1: Clements<br>T2: Polick                          | <i>Type 1: Praise with or without additional rewards.</i> In 2 comparisons, participants learned faster when praise was paired with other rewards. In 4 comparisons, results were undifferentiated. <i>Type 2: General vs. Specific praise.</i> In 4 comparisons, participants learned faster when descriptive praise was provided; in 4 comparisons, data were undifferentiated; in 1 one comparison, a participant learned faster when general praise was provided.                                                                                                                                                          |
| Error Correction (EC) Type | T1: Waugh<br>T2: Carroll, 2013<br>T3: Carroll, 2013 | <i>Type 1: EC versus none.</i> In 2 comparisons, participants acquired skills faster when EC was provided; data were undifferentiated for third. <i>Type 2: Multiple corrections vs. single.</i> For 6 comparisons, participants acquired skills faster when multiple corrections were provided; for 2, participants acquired skills slower. For 2 comparisons, data were undifferentiated. <i>Type 3: Model as EC vs. Model + presentation of new trial.</i> For 14 comparisons, participants acquired skills faster and for 3 acquired skills slower when trial was provided. For 3 comparisons, data were undifferentiated. |

Supplemental Narrative Description of Outcomes  
PART 4: OTHER INSTRUCTIONAL VARIATIONS

|                   | First Author                                                 | Narrative Description of Results                                                                                                                                                                                                                                                                                                                                                                                                                                                                                                                                                                                                                                                           |
|-------------------|--------------------------------------------------------------|--------------------------------------------------------------------------------------------------------------------------------------------------------------------------------------------------------------------------------------------------------------------------------------------------------------------------------------------------------------------------------------------------------------------------------------------------------------------------------------------------------------------------------------------------------------------------------------------------------------------------------------------------------------------------------------------|
| Fidelity          | T1: Carroll, 2013<br>T1: Owsiany, 2013<br>T2: Carroll, 2013  | <i>Type 1: High (HF) vs. low fidelity (LF).</i> In 25 comparisons, participants learned faster when high fidelity instruction was provided; in 7 comparisons, participants learned faster when low fidelity instruction was provided; in 19 comparisons, data were undifferentiated. <i>Type 2: Different fidelity errors.</i> In 4 comparisons, LF reinforcement resulted in faster learning than LF prompts (n = 2) or instructions (n = 2). In 2 comparisons, LF instructions resulted in faster learning than LF prompts (n = 1) or reinforcement (n = 1). In 1 comparison, LF prompts resulted in faster learning than LF reinforcement; in 2 comparisons data were undifferentiated. |
| Frequency         | Julien Spino                                                 | In one comparison each, participants acquired skills faster or slower when more frequent instruction occurred. In 3 comparisons, data were undifferentiated.                                                                                                                                                                                                                                                                                                                                                                                                                                                                                                                               |
| Group Size        | Colozzi<br>Hawkins<br>Leaf, 2013                             | In 14 comparisons, participants learned faster during individual instruction; in 6, participants learned faster during group instruction; in 16, data were undifferentiated.                                                                                                                                                                                                                                                                                                                                                                                                                                                                                                               |
| Prompt Mode       | Leaf, 2016b                                                  | For 1 comparison, a participant learned faster with indirect rather than direct verbal prompts; for 4 comparisons, data were undifferentiated.                                                                                                                                                                                                                                                                                                                                                                                                                                                                                                                                             |
| Trial Arrangement | T1: Ledford<br>T1: Majdalany, 2014<br>T2: George<br>T3: Call | <i>Type 1: Massed trials versus embedded in play or during the day:</i> In 5 comparisons, participants learned faster with massed trials; in 3 comparisons, participants learned faster with embedded/distributed trials, and in 3 comparisons, data were undifferentiated. <i>Type 2: Participate in attending cues for all trials or only individual trials:</i> In all 6 comparisons, data were undifferentiated. <i>Type 3: Shorter vs. longer interval between trials.</i> For 1 comparison, a participant learned faster with a shorter ITI; for 2, data were undifferentiated.                                                                                                      |
| Trial Ordering    | Majdalany, 2014                                              | For 4 comparisons, participants learned faster when known (mastered) stimuli were not interspersed with unknown (instructional) stimuli; for 1 comparison, a participant learned faster when unknown stimuli were interspersed; for 1 comparison, data were undifferentiated.                                                                                                                                                                                                                                                                                                                                                                                                              |
